# Supplementary material for: Thymol Nanoemulsion: A New Therapeutic Option for Extensively Drug Resistant Foodborne Pathogens
Source: PubMed Central journal article supplement (PMC7823989; doi:10.3390/antibiotics10010025), 2020-12-30
Supplement: antibiotics-10-00025-s001.pdf [file antibiotics-10-00025-s001.pdf]

**Table S1.** MIC and MBC values (%) of thymol nanoemulsion against MDR and XDR *S. enteritidis* strains.

| Strain Resistance Category | Strain Code | MIC (% v/v) | MBC (% v/v) |
|----------------------------|-------------|-------------|-------------|
| MDR                        | 1           | 0.5         | 1           |
|                            | 2           | 1           | 1           |
|                            | 3           | 1           | 2           |
|                            | 4           | 0.5         | 1           |
|                            | 5           | 1           | 2           |
|                            | 6           | 1           | 2           |
|                            | 7           | 1           | 2           |
|                            | 8           | 0.5         | 2           |
|                            | 9           | 1           | 2           |
|                            | 10          | 0.5         | 1           |
|                            | 11          | 1           | 2           |
|                            | 12          | 1           | 2           |
|                            | 13          | 1           | 2           |
|                            | 14          | 1           | 2           |
|                            | 15          | 0.5         | 1           |
|                            | 16          | 0.5         | 1           |
|                            | 17          | 0.5         | 1           |
|                            | 18          | 1           | 2           |
|                            | 19          | 1           | 2           |
|                            | 20          | 1           | 2           |
|                            | 21          | 0.5         | 2           |
|                            | 22          | 1           | 2           |
|                            | 23          | 0.5         | 1           |
|                            | 24          | 1           | 2           |
|                            | 25          | 1           | 2           |
|                            | 26          | 1           | 2           |
|                            | 27          | 0.5         | 1           |
|                            | 28          | 1           | 2           |
|                            | 29          | 1           | 2           |
|                            | 30          | 1           | 2           |
| XDR                        | 31          | 3           | 5           |

MDR: multidrug resistant, XDR: extensively drug resistant, MIC: minimum inhibitory concentration, MBC: minimum bactericidal concentration.
